# Supplementary material for: Leaf Microbiome Differences Between Winter (Invasive) and Summer (Non-invasive) Annual Growth forms of Anthemis cotula L.: Insights into Invasiveness
Source: Research Square preprint supplement (doi:10.21203/rs.3.rs-8004386/v1), 2026-01-22
Supplement: Supplementary file 1 [file 10f4677409aec4e670d95404.docx]

**Leaf Microbiome Differences Between Winter (Invasive) and Summer (Non-invasive) Annual Growth forms of *Anthemis cotula* L.: Insights into Invasiveness**

Iqra Bashir and Zafar A Reshi*

Department of Botany

University of Kashmir, Srinagar-190006, Jammu & Kashmir, India

***Corresponding author:zreshi@gmail.com**

Supplementary Table S1. Sampling sites used in the study, including location coordinates and altitudes above mean sea level (amsl). The three sites—Daksum (Anantnag), University of Kashmir (Srinagar), and Tangmarg (Baramulla)—span a broad elevation gradient from 1,540 to 2,345 meters, encompassing varied ecological zones within the Kashmir Himalaya.

| S. No | Site | Latitude | Longitude | Altitude  (in meters amsl) |
| --- | --- | --- | --- | --- |
| 01 | Daksum, Anantnag | 33°36'36.75"N | 75°26'6.23"E | 2345 |
| 02 | University of Kashmir, Srinagar | 34° 7'44.42"N | 74°50'32.57"E | 1540 |
| 03 | Tangmarg, Baramulla | 34° 3'44.37"N | 74°25'22.63"E | 2000 |
